# Supplementary material for: Targeted Chemoproteomics Identifies COEAE6G Esterase Driving Insecticide Cross-Resistance in African Malaria Vector
Source: Research Square preprint supplement (doi:10.21203/rs.3.rs-5884037/v1), 2025-02-13
Supplement: Supplementary file 1 [file 1080fe82ff741bd42ff389d2.xlsx]

## Sheet: Sheet1
Sample	Protein Count	Average
FP_1	346	348
FP_2	354
FP_3	344
PMO_FP_1	324	300.667
PMO_FP_2	270
PMO_FP_3	308
Heat_FP_1	190	176.667
Heat_FP_2	167
Heat_FP_3	173
